# Supplementary material for: Towards the Standardization of Intestinal In Vitro Advanced Barrier Model for Nanoparticles Uptake and Crossing: The SiO2 Case Study
Source: MDPI journal article supplement (doi:10.3390/cells11213357), 2022-10-25
Supplement: s1 [file s1]

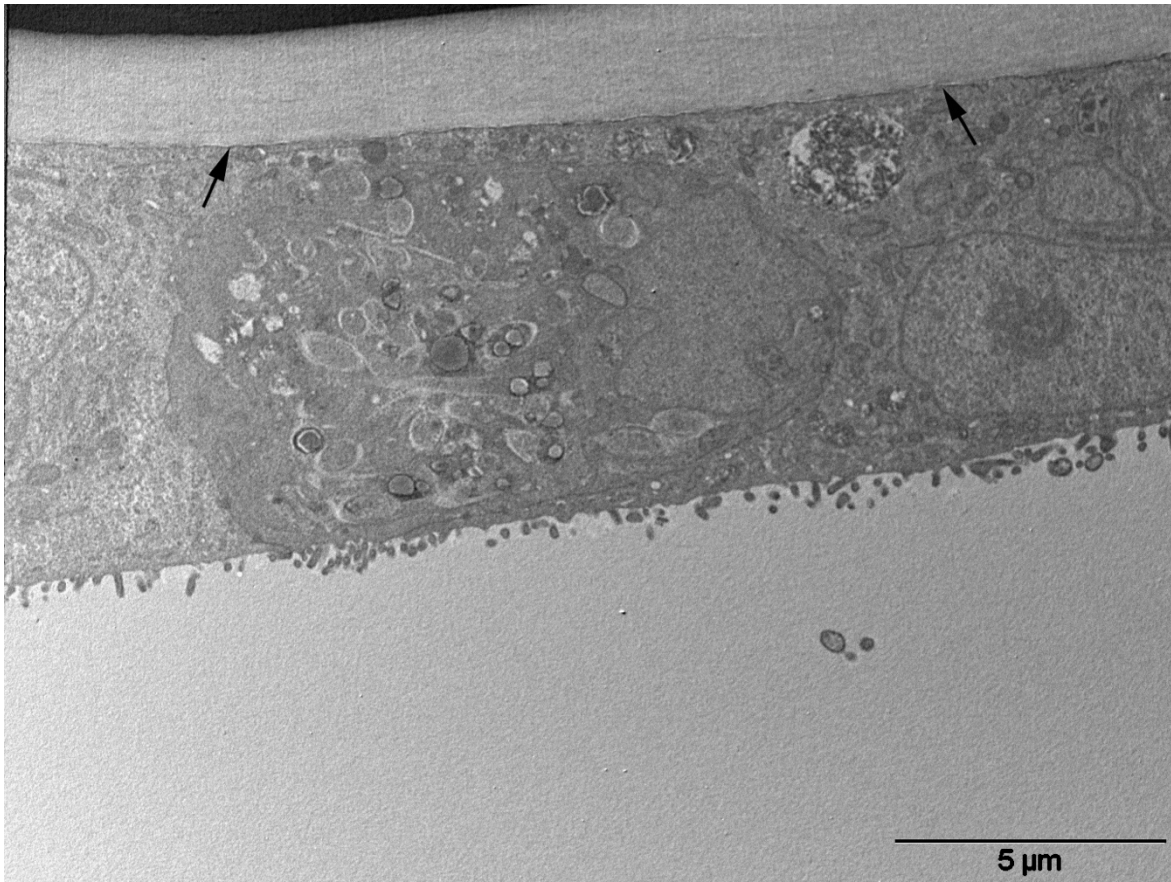

Figure S1. TEM sagittal image of Caco-2 monoculture cultured on 3 μm filters.

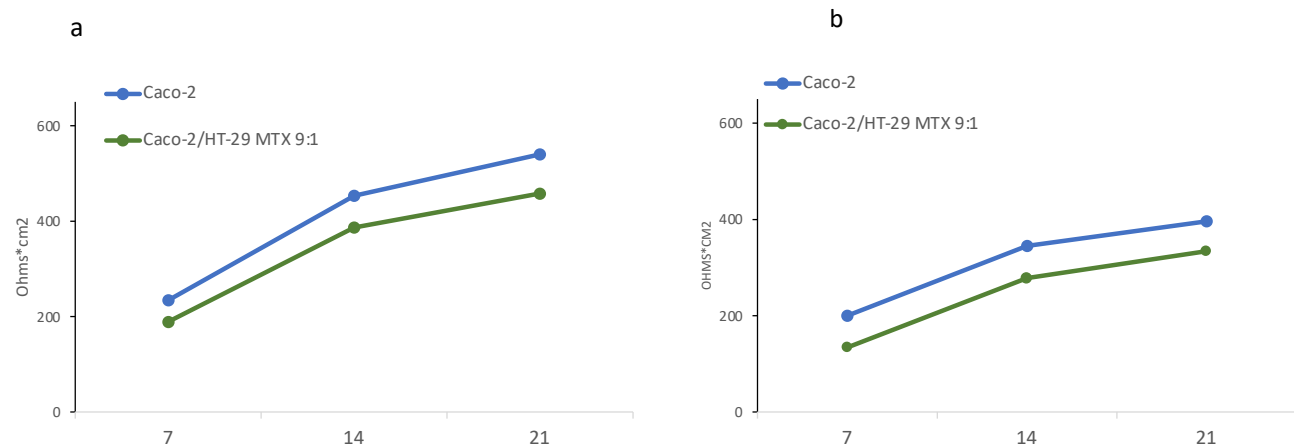

Figure S2. TEER measurement at different days of culture in 1 and 3  $\mu\text{m}$  both for Caco-2 monolayer and Caco-2/HT-29 MTX co-culture.

## H2O To

|                                | Size (d.nm):         | % Intensity: | St Dev (d.nm): |
|--------------------------------|----------------------|--------------|----------------|
| <b>Z-Average (d.nm):</b> 86,97 | <b>Peak 1:</b> 94,65 | 100,0        | 27,62          |
| <b>Pdi:</b> 0,089              | <b>Peak 2:</b> 0,000 | 0,0          | 0,000          |
| <b>Intercept:</b> 0,945        | <b>Peak 3:</b> 0,000 | 0,0          | 0,000          |
| <b>Result quality :</b> Good   |                      |              |                |

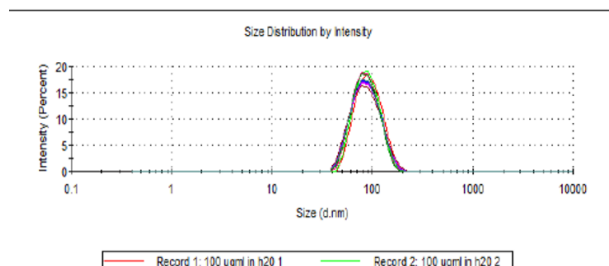

## DMEM To

|                                | Size (d.nm):         | % Intensity: | St Dev (d.nm): |
|--------------------------------|----------------------|--------------|----------------|
| <b>Z-Average (d.nm):</b> 160,3 | <b>Peak 1:</b> 206,6 | 100,0        | 106,6          |
| <b>Pdi:</b> 0,234              | <b>Peak 2:</b> 0,000 | 0,0          | 0,000          |
| <b>Intercept:</b> 0,966        | <b>Peak 3:</b> 0,000 | 0,0          | 0,000          |
| <b>Result quality :</b> Good   |                      |              |                |

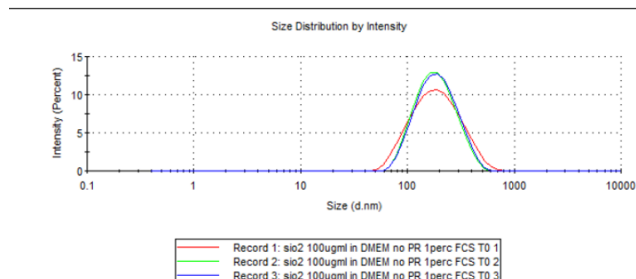

## DMEM T24

|                                                 | Size (d.nm):         | % Intensity: | St Dev (d.nm): |
|-------------------------------------------------|----------------------|--------------|----------------|
| <b>Z-Average (d.nm):</b> 126,2                  | <b>Peak 1:</b> 178,0 | 100,0        | 69,90          |
| <b>Pdi:</b> 0,291                               | <b>Peak 2:</b> 0,000 | 0,0          | 0,000          |
| <b>Intercept:</b> 0,948                         | <b>Peak 3:</b> 0,000 | 0,0          | 0,000          |
| <b>Result quality :</b> Refer to quality report |                      |              |                |

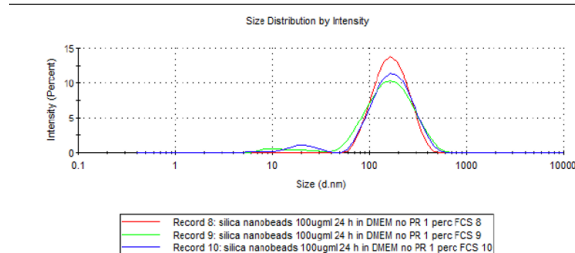

Figure S3. SiO<sub>2</sub> nano beads graphs of population size distribution for intensity obtained by DLS analysis:

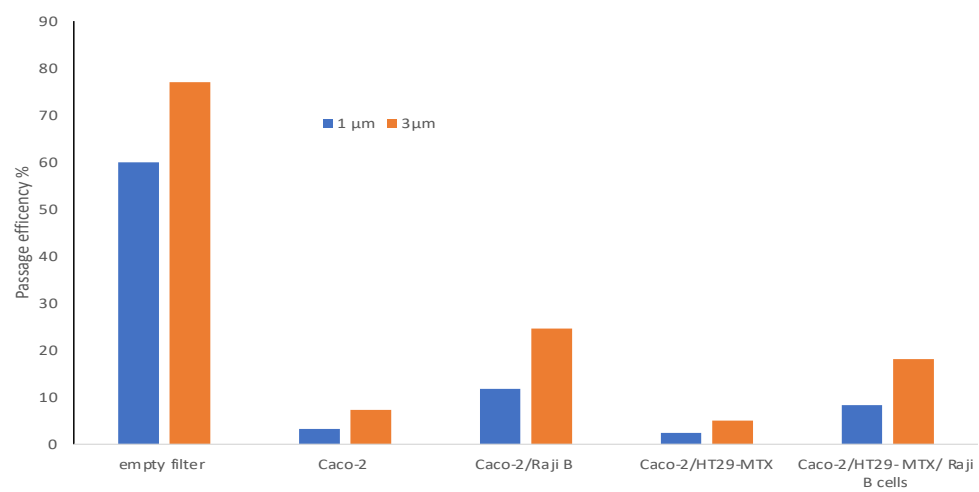

Figure S4. SiO<sub>2</sub> Translocation studies title through empty filters and cell monolayers
